# Supplementary material for: Breaking supercontinents; no need to choose between passive or active
Source: Copernicus journal article supplement (doi:10.5194/se-8-817-2017), 2017-08-07
Supplement: Supplementary file [file se-8-817-2017-supplement-title-page.pdf › se-8-817-2017-supplement-title-page.pdf]

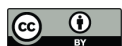

## *Supplement of*

# **Breaking supercontinents; no need to choose between passive or active**

**Martin Wolstencroft and J. Huw Davies**

*Correspondence to:* J. Huw Davies ([daviesjh2@cardiff.ac.uk](mailto:daviesjh2@cardiff.ac.uk))

- [se-8-817-2017-supplement-title-page.pdf](#)
- [Caption\\_to\\_Supplementary\\_Animation\\_1.pdf](#)
- [Supplementary\\_Animation\\_1\\_Case1.mp4](#)

The copyright of individual parts of the supplement might differ from the CC BY 3.0 License.
